# Supplementary material for: A comparative recombination analysis of human coronaviruses and implications for the SARS-CoV-2 pandemic
Source: bioRxiv or medRxiv preprint supplement (doi:10.1101/2021.03.07.434287), 2021-03-08
Supplement: Supplementary file [file media-2.pdf]

**Table S2. Location of breakpoints in SARS-CoV-2 recombinants identified with moderate-level evidence\***

| Potential Recombinant Sequence | Date      | Data Subset <sup>a</sup> | Total number of sequences found with event | n methods positive total | Breakpoint locations   |                |              |
|--------------------------------|-----------|--------------------------|--------------------------------------------|--------------------------|------------------------|----------------|--------------|
|                                |           |                          |                                            |                          | Gene(s) involved       | Begin (genome) | End (genome) |
| Australia/VIC10098/2020        | 8/12/2020 | 21                       | 26                                         | 6                        | nsp3                   | 6983           | 7492         |
| Italy/LOM-UniMI02/2020         | 2/24/2020 | 21                       | 1                                          | 6                        | nsp3,nsp4              | 6498           | 8353         |
| India/GJ-GBRC71/2020           | 4/27/2020 | 29                       | 166                                        | 5                        | nsp3, nsp16            | 2586           | 25286        |
| Malaysia/190300/2020           | 3/22/2020 | 41                       | 1                                          | 5                        | nsp13, orf7a           | 19728          | 27173        |
| England/20139052002/2020       | 3/27/2020 | 75                       | 297                                        | 4                        | nsp3, nsp4             | 6205           | 8688         |
| England/MILK-99250B/2020       | 8/27/2020 | 94                       | 4                                          | 4                        | spike_S1_RBD, spike_S2 | 22858          | 24152        |
| India/KA-InStem-NCBS-0080/2020 | 6/17/2020 | 94                       | 1                                          | 4                        | spike_S1_RBD           | 22172          | 23072        |
| England/ALDP-9BDA83/2020       | 9/10/2020 | 99                       | 264                                        | 4                        | nsp2, ORF3a            | 510            | 25409        |

\*No recombinants were identified with high level evidence as all may have been explained by another process other than recombination
